# Supplementary material for: Ex Vivo Infection of Human Placental Explants by Trypanosoma cruzi Reveals a microRNA Profile Similar to That Seen in Trophoblast Differentiation
Source: MDPI journal article supplement (doi:10.3390/pathogens11030361), 2022-03-16
Supplement: s1 [file s1]

Supplementary data

Supplementary Figure S1

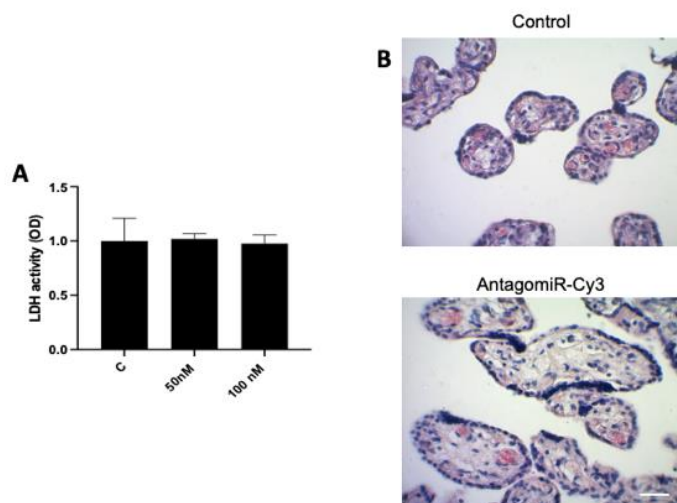

**Supplementary Figure S1. HPE can be effectively transfected without causing tissue damage:** HPE were transfected with 50 or 100 nM of AntagomiR-Cy3 during 24 hours. (A) Transfection with either 50 nM or 100 nM does not affect explant viability, as shown by lactate dehydrogenase activity determined by a commercial kit according to manufacturers' instructions. Samples transfected with 100 nM of AntagomiR-Cy3 were processed for routine histological methods and stained with hematoxylin-eosin (B) and showed no evidence of tissue damage. Bar scale: 25  $\mu$ m.
